# Supplementary material for: Proton Conducting Membranes with Molecular Self Assemblies and Ionic Channels for Efficient Proton Conduction
Source: MDPI journal article supplement (doi:10.3390/membranes12121174), 2022-11-22
Supplement: s1 [file s1]

**Table S1. Properties of organic heterocycles used as proton facilitators**

| Organic base        | mp °C | bp °C   | Acidity ( <i>pKa</i> ) |
|---------------------|-------|---------|------------------------|
| Pyrazole            | 68    | 168-188 | 2.5                    |
| 1H-1, 2, 4-Triazole | 120   | 260     | 2.2                    |
| Benzimidazole       | 170   | 360     | 8.52                   |

**Table S2. Anhydrous proton conductivities for other molecular systems with ionic channels reported in the literature**

| S.N. | Anhydrous proton exchange materials <sup>a</sup>    | Anhydrous proton conductivity <sup>b</sup> | Temperature |
|------|-----------------------------------------------------|--------------------------------------------|-------------|
| 1.   | Phosphonated self-assembled system <sup>c</sup>     | 10 <sup>-2</sup> S/cm                      | 140 °C      |
| 2.   | Self-organized molecular system <sup>d</sup>        | 10 <sup>-3</sup> S/cm                      | 150 °C      |
| 3.   | Polymers with the ionic channels <sup>e</sup>       | 2.4 × 10 <sup>-6</sup> S/cm                | 90 °C       |
| 4.   | Imidazole-containing triblock polymers <sup>f</sup> | 9.7 × 10 <sup>-4</sup> S/cm                | 240 °C      |

<sup>a</sup>Polymeric or nonpolymeric membranes reported in the literature; <sup>b</sup> Proton conductivity in the absence of water

<sup>c, d</sup> Reference no. 15 and 16 in main manuscript

<sup>e</sup>Tuning anhydrous proton conduction in single-ion polymers by crystalline ion channels, Onnuri Kim, Kyoungwook Kim, U. Hyeok Choi, Moon Jeong Park Nat Commun 9, 5029 (2018)

<sup>f</sup>Chainika Jangu, Jing-Han Helen Wang, Dong Wang, Gregory Fahs, James R. Heflin, Robert B. Moore, Ralph H. Colby, Timothy E. Long, Imidazole-containing triblock copolymers with a synergy of ether and imidazolium sites, J. Mater. Chem. C, 2015, 3, 3891-3901

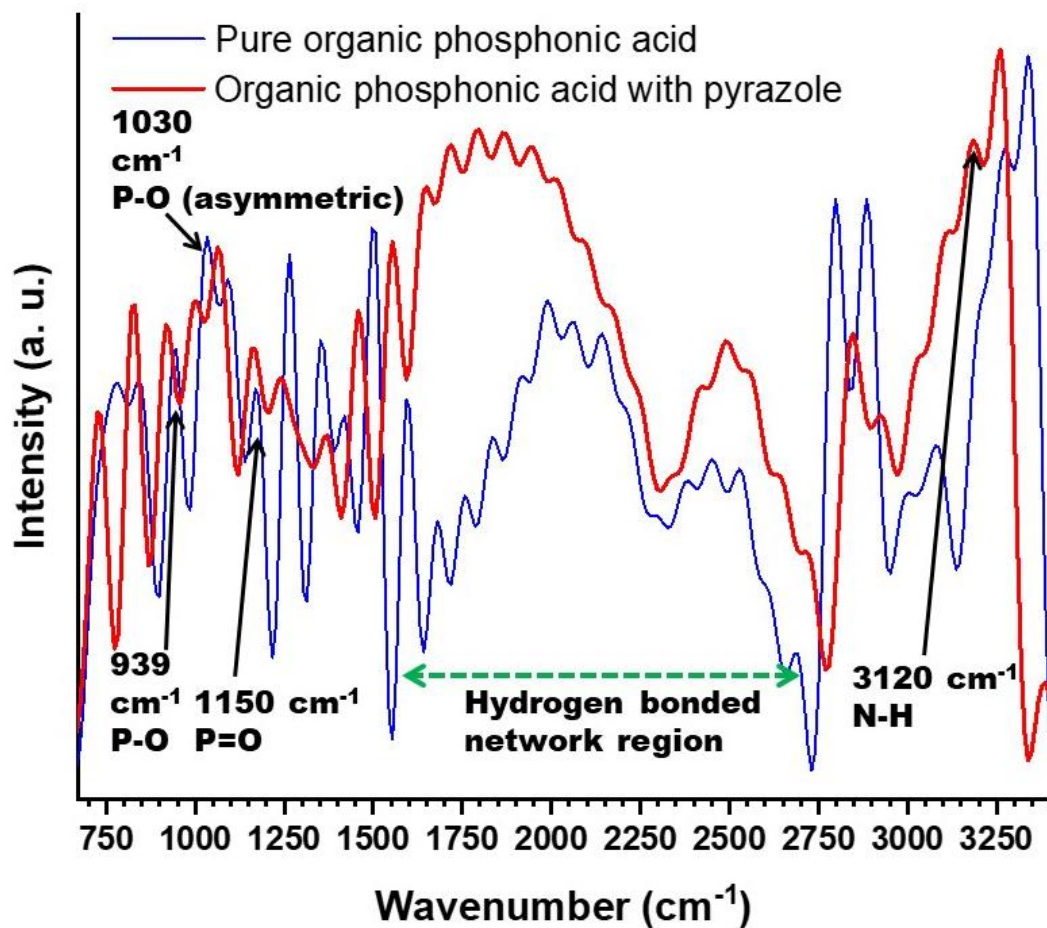

**Figure S1** FT-IR spectra of (blue line, before complex formation) pure organophosphonic acid 1 and (red line, after complex formation) the acid-base composite of the organophosphonic acid 1 and pyrazole.

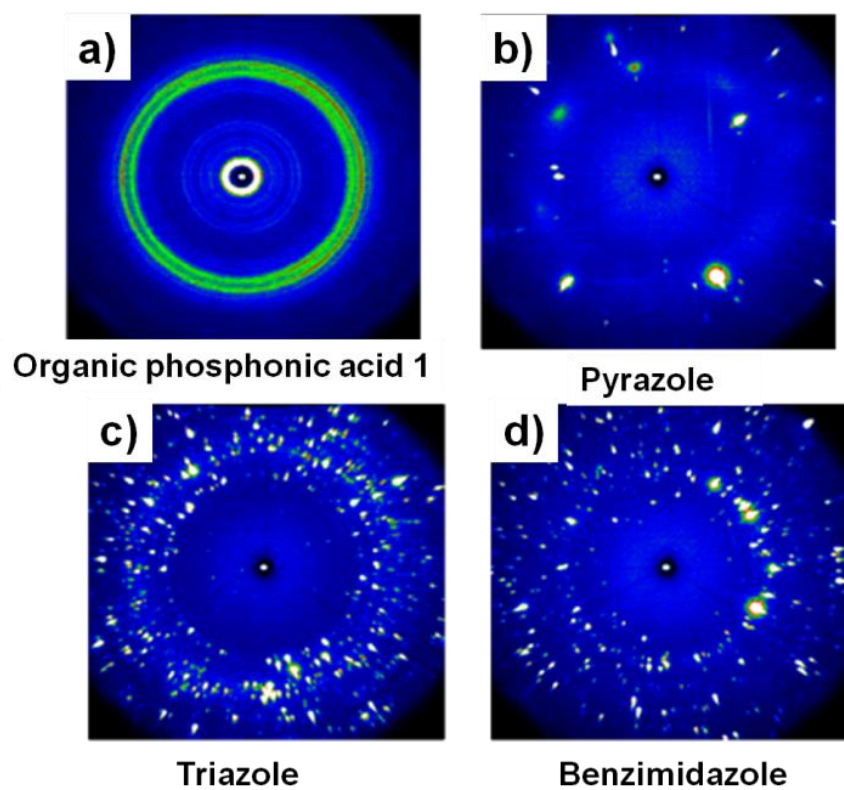

**Figure S2** 2DWAXS patterns of a) organic phosphonic acid 1, b) pyrazole, c) triazole, and d) benzimidazole before mixing them together.

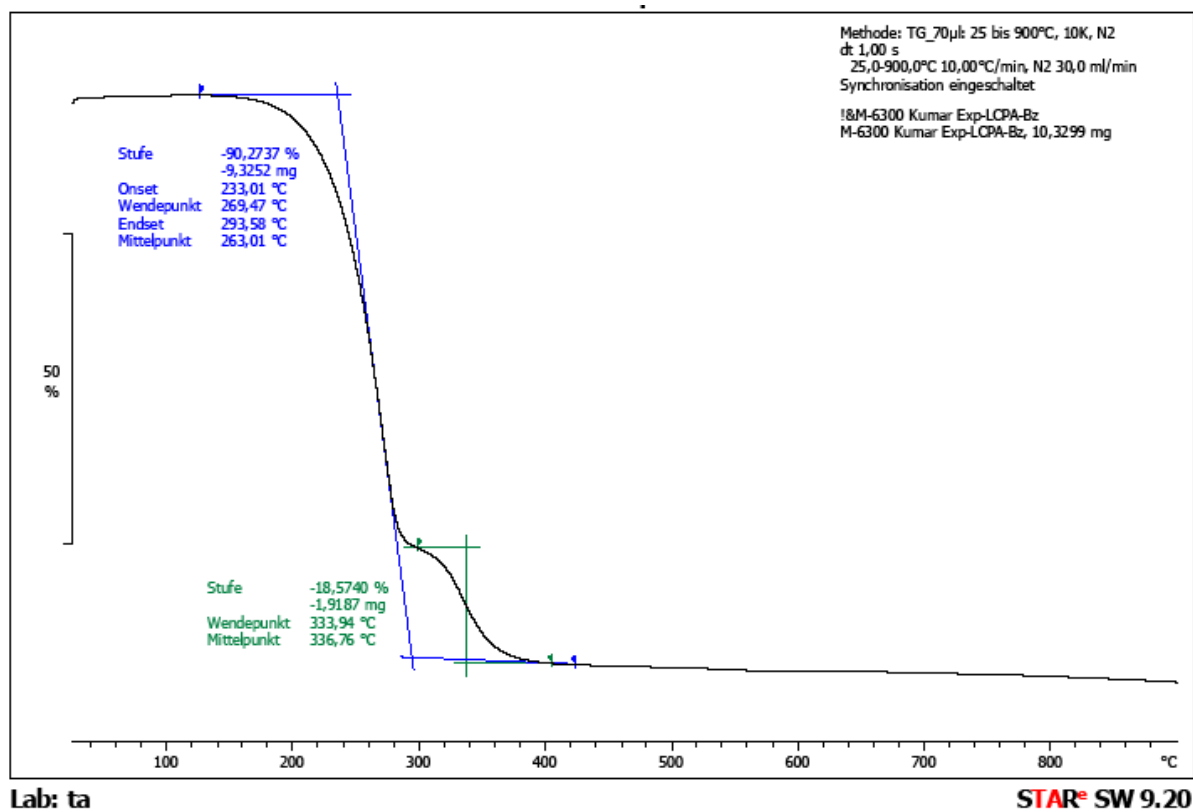

**Figure S3** Thermogravimetric analysis of molecular wires with benzimidazole under N<sub>2</sub>.
